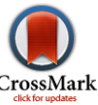

Correction

# Correction: Survival Benefits of Metformin for Colorectal Cancer Patients with Diabetes: A Systematic Review and Meta-Analysis

The PLOS ONE Staff

The legends for Figures 3, 4, and 5 are incorrectly switched. The legend that appears for Figure 3 belongs with Figure 4, the legend that appears for Figure 4 belongs with Figure 5, and the legend that appears for Figure 5 belongs with Figure 3. The figures themselves appear in the correct order. Please see the complete, corrected Figure 3 here.

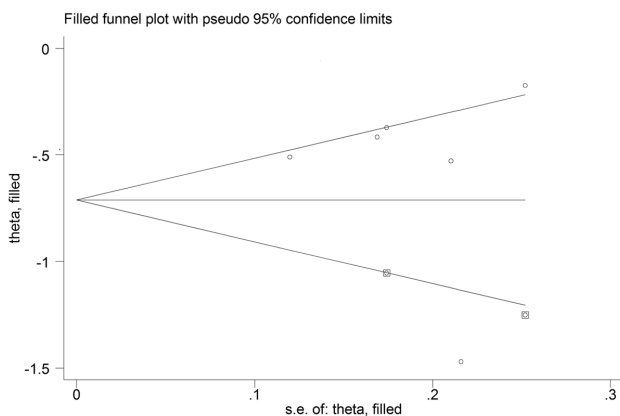

**Figure 3. Filled funnel plot with 95% CI indicating two hypothesized studies missing.**  
doi:10.1371/journal.pone.0091818.g003

Please see the complete, corrected Figure 4 here.

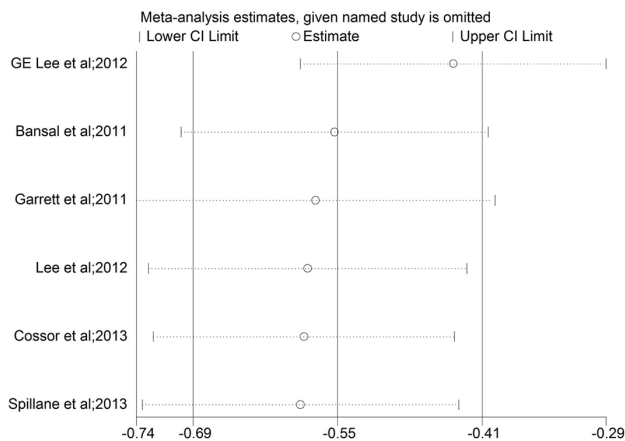

**Figure 4. Plot of sensitivity analysis by excluding one study each time and the pooling estimate for the rest of the studies.**  
doi:10.1371/journal.pone.0091818.g004

**Citation:** The PLOS ONE Staff (2014) Correction: Survival Benefits of Metformin for Colorectal Cancer Patients with Diabetes: A Systematic Review and Meta-Analysis. PLoS ONE 9(7): e103652. doi:10.1371/journal.pone.0103652

**Published** July 25, 2014

**Copyright:** © 2014 The PLOS ONE Staff. This is an open-access article distributed under the terms of the Creative Commons Attribution License, which permits unrestricted use, distribution, and reproduction in any medium, provided the original author and source are credited.

Please see the complete, corrected Figure 5 here.

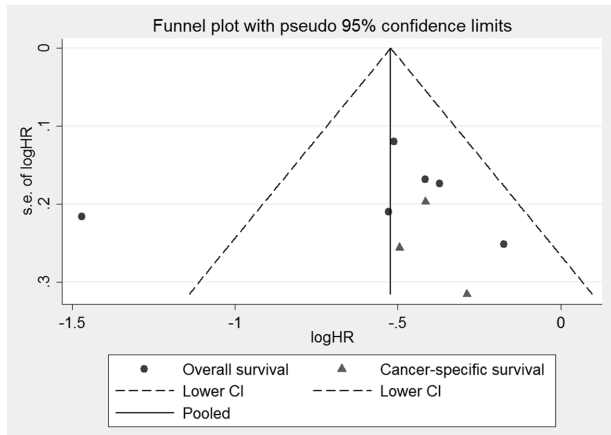

**Figure 5. Funnel plots of the relationship between the HRs of individual studies and the precision of the study estimate (Log hazard ratio, horizontal axis; standard error, vertical axis).**  
doi:10.1371/journal.pone.0091818.g005

## Reference

1. Mei Z-B, Zhang Z-J, Liu C-Y, Liu Y, Cui A, et al. (2014) Survival Benefits of Metformin for Colorectal Cancer Patients with Diabetes: A Systematic Review and Meta-Analysis. *PLoS ONE* 9(3): e91818. doi:10.1371/journal.pone.0091818
